# Supplementary material for: The TRRAP transcription cofactor represses interferon-stimulated genes in colorectal cancer cells
Source: eLife. 2022 Mar 4;11:e69705. doi: 10.7554/eLife.69705 (PMC8926402; doi:10.7554/eLife.69705)
Supplement: Supplementary file 5. [file elife-69705-supp5.xlsx]

## Sheet: Table S5
Supplemental Table 5. List of oligonucleotides used in this study.
Gene	Name		Purpose	Region targeted	Sequence
TELO2	DHO	1067	CRISPR-KI C-ter TELO2 sgRNA A	3 prime neat stop codon	CACCGACCACCCTCGCCGACAGCA
TELO2	DHO	1068	CRISPR-KI C-ter TELO2 sgRNA A	3 prime near stop codon	AAACTGCTGTCGGCGAGGGTGGTC
TELO2	DHO	1069	CRISPR-KI C-ter TELO2 sgRNA B	3 prime near stop codon	CACCGAGGGACTAGGGAGACGCGGG
TELO2	DHO	1070	CRISPR-KI C-ter TELO2 sgRNA B	3 prime near stop codon	AAACCCCGCGTCTCCCTAGTCCCTC
TRRAP	DHO	1227	CRISPR-KI N-ter TRRAP sgRNA C	3 prime near start codon	CACCGGCGTTTGTTGCAACACAGG
TRRAP	DHO	1228	CRISPR-KI N-ter TRRAP sgRNA C	3 prime near start codon	AAACCCTGTGTTGCAACAAACGCC
TRRAP	DHO	1229	CRISPR-KI N-ter TRRAP sgRNA D	3 prime near start codon	CACCGCTTCTCAAGAGAAAAGTATC
TRRAP	DHO	1230	CRISPR-KI N-ter TRRAP sgRNA D	3 prime near start codon	AAACGATACTTTTCTCTTGAGAAGC
PPIB	DHO	1083	RT-qPCR		CTTCCCCGATGAGAACTTCAAACT
PPIB	DHO	1084	RT-qPCR		CACCTCCATGCCCTCTAGAACTTT
CCNA2	DHO	1146	RT-qPCR		AGATGAAAAGCCAGTGAGTGT
CCNA2	DHO	1147	RT-qPCR		GTGATGTCTGGCTGTTTCTTCA
KRT20	DHO	1114	RT-qPCR		TCATGGCCCAGAAGAACCTT
KRT20	DHO	1115	RT-qPCR		TTCACTGTGACCTGTTGCTG
OAS1	DHO	1389	RT-qPCR		AGTTGACTGGCGGCTATAAAC
OAS1	DHO	1390	RT-qPCR		GTGCTTGACTAGGCGGATGAG
IFIT1	DHO	1402	RT-qPCR		TGACGTCAATGCAATTATCCA
IFIT1	DHO	1403	RT-qPCR		GCCCGCTCATAGTACTCCAG
IRF7	DHO	1404	RT-qPCR		CGAGCTGCACGTTCCTATAC
IRF7	DHO	1405	RT-qPCR		AGCAGTTCCTCCGTGTAGC
IRF9	DHO	1497	RT-qPCR		TTCAGACATTGGGAGCAGCA
IRF9	DHO	1498	RT-qPCR		AGGAAGCAGAAACTCCAGGG
RIG-I	DHO	1578	RT-qPCR		GAGGATCTTCAGGCCCACT
RIG-I	DHO	1579	RT-qPCR		CTTGCTCCAGTTCCTCCAGA
MYB	DHO	1681	RT-qPCR		TGATGAAGACCCTGAGAAGGA
MYB	DHO	1682	RT-qPCR		GGTGTTCTCCCAAACAGGAA
GNL3	DHO	1685	RT-qPCR		GGGCTTTGCAAAACTGAGAA
GNL3	DHO	1686	RT-qPCR		TGGCCTCTTCTACCTGAGGA
MIR17HG	DHO	1691	RT-qPCR		GCCCAATCAAACTGTCCTGT
MIR17HG	DHO	1692	RT-qPCR		ACCGATCCCAACCTGTGTAG
MX1	DHO	1733	RT-qPCR		CGACACGAGTTCCACAAATG
MX1	DHO	1734	RT-qPCR		TGCCTTGATTTGCTGTTTCA
HERPUD	DHO	1077	RT-qPCR		GGTTGGGGTCTTCAGTTTCAGG
HERPUD	DHO	1078	RT-qPCR		CTACTCCTCCCTGAGCAGATTC
CHOP	DHO	1101	RT-qPCR		AAGGCACTGAGCGTATCATGT
CHOP	DHO	1102	RT-qPCR		TGAAGATACACTTCCTTCTTGAAC
SUPT20H	DHO	1093	RT-qPCR		GCAGTCACCTGCACTGCAAACA
SUPT20H	DHO	1094	RT-qPCR		TCAGCTGAGGAGGAGGTGGACA
PPIB-intron1	DHO	1968	nascent RT-qPCR	intron 1	TCTCTCTCCCATCCTCAGGT
PPIB-intron1	DHO	1969	nascent RT-qPCR	intron 1	AGAGACCAAAGATCACCCGG
IRF9-intron2	DHO	1972	nascent RT-qPCR	intron 2	GTGGATCACGAGGTCAAGAGA
IRF9-intron2	DHO	1973	nascent RT-qPCR	intron 2	TCCCTGGTTCAAGCGATTCT
OAS1-intron1	DHO	1974	nascent RT-qPCR	intron 1	TGCAATGCCTTCAGAACAGT
OAS1-exon2	DHO	1975	nascent RT-qPCR	exon 2	AGTGGTGAGAGGACTGAGGA
IRF7-intron2	DHO	2000	nascent RT-qPCR	intron 2	GGGGAACATTCTCTGGGTCA
IRF7-intron2	DHO	2001	nascent RT-qPCR	intron 2	TCCTGGCTGTGAACCCTTAG
MIR17HG	DHO	1691	CUTnRUN	gene body	GCCCAATCAAACTGTCCTGT
MIR17HG	DHO	1692	CUTnRUN	gene body	ACCGATCCCAACCTGTGTAG
MIR17HG	DHO	1721	CUTnRUN	promoter	CTTTGCAGTCTCGGGTGTTC
MIR17HG	DHO	1722	CUTnRUN	promoter	CAACTGCTGTGGTCCTGATG
IRF9	DHO	1793	CUTnRUN	promoter	GGCTAGAAAGTCCAGCCAGA
IRF9	DHO	1794	CUTnRUN	promoter	GGCCCTTGTCAGTCTCACTC
IRF7	DHO	1945	CUTnRUN	promoter	CCAGCTCTTGGCTCTACCC
IRF7	DHO	1946	CUTnRUN	promoter	GCTCTGGCACCCAGGTACT
IRF9	DHO	1841	ChIP	gene body-intron 7	CTCTCCTCCAGCCAAGACAA
IRF9	DHO	1842	ChIP	gene body-intron 7	TGCCAATTCTTCTGTGCACC
IRF7	DHO	1404	ChIP	gene body-exon 8	CGAGCTGCACGTTCCTATAC
IRF7	DHO	1405	ChIP	gene body-exon 8	AGCAGTTCCTCCGTGTAGC
