# Supplementary material for: The TRRAP transcription cofactor represses interferon-stimulated genes in colorectal cancer cells
Source: eLife. 2022 Mar 4;11:e69705. doi: 10.7554/eLife.69705 (PMC8926402; doi:10.7554/eLife.69705)
Supplement: Supplementary file 6. [file elife-69705-supp6.xlsx]

## Sheet: Table S6
Supplemental Table 6. List of antibodies used in this study.
Protein targeted	Provider	Catalog number
ATR	CST	13934
ATM	CST	2873
SUPT7L	Bethyl	A-302-803A-1
TRRAP	L. TORA lab	2TRR-1B3 16 1
TADA3	L. TORA lab	2678
TELO2	ProteinTech	15975-1-AP
TTI1	Santa Cruz Biotechnology	sc-271638
GAPDH	Santa Cruz Biotechnology	sc-25778
mTOR	CST	2972
phospho-p70 S6 (T389)	CST	9234
p70 S6	CST	9202
TRRAP	L. TORA lab	2TRR-2DR5 16 1
SGF29	L. TORA lab	2461
SUPT3H	L. TORA lab	3118
SUPT3H	L. TORA lab	1-SP-2C10
TAF10	L. TORA lab	2B11
TADA1	Novusbio	NBP1-56629
IRF7	Biolegend	656002
IRF3	CST	4302
Phospho-IRF3 (S396)	Abcam	ab76293
LaminA/C	CST	2032
RIG-I	CST	3743
RIG-I	Milipore	MABF297
LamiA/C	CST	4777
cMYC	CST	13987
IRF9	Biolegend	660702
HA	Abcam	ab9110
Tubulin	Sigma	T6074
RNA Polymerase II	Santa Cruz	sc-55492
